# Supplementary material for: Light Harvesting Nanoprobe for Trace Detection of Hg2+ in Water
Source: MDPI journal article supplement (doi:10.3390/molecules28041633), 2023-02-08
Supplement: s1 [file s1]

# Light Harvesting Nanoprobe for Trace Detection of Hg<sup>2+</sup> in Water

Aleksandr Chepak <sup>1</sup>, Denis Balatskiy <sup>1</sup>, Mikhail Tutov <sup>1,2</sup>, Aleksandr Mironenko <sup>1</sup>  
and Svetlana Bratskaya <sup>1,\*</sup>

1 Institute of Chemistry, Far Eastern Branch, Russian Academy of Sciences, 159, Prosp. 100-letiya Vladivostoka,  
Vladivostok 690022, Russia

2 Far Eastern Federal University, 10 Ajax Bay, Russky Island, Vladivostok 690922, Russia

\* Correspondence: s.bratskaya@gmail.com

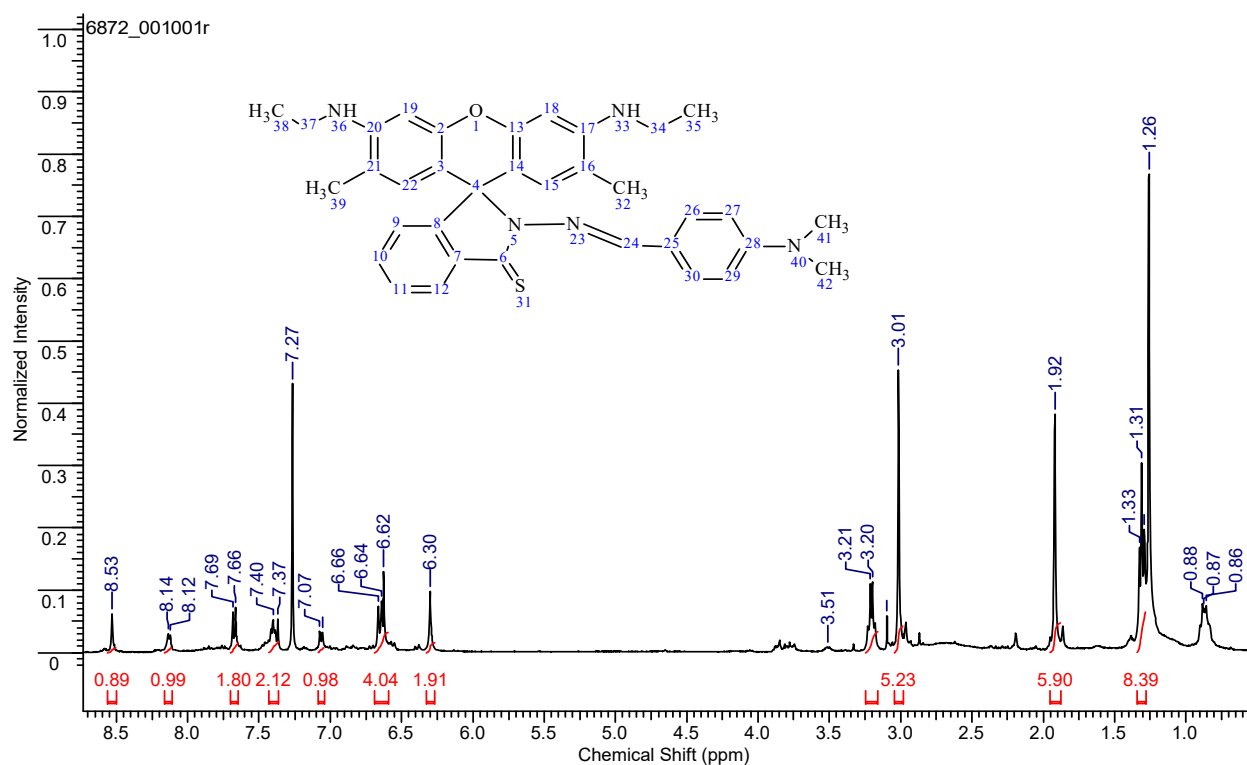

Figure S1. <sup>1</sup>H NMR spectrum of d114 recorded in CDCl<sub>3</sub>.

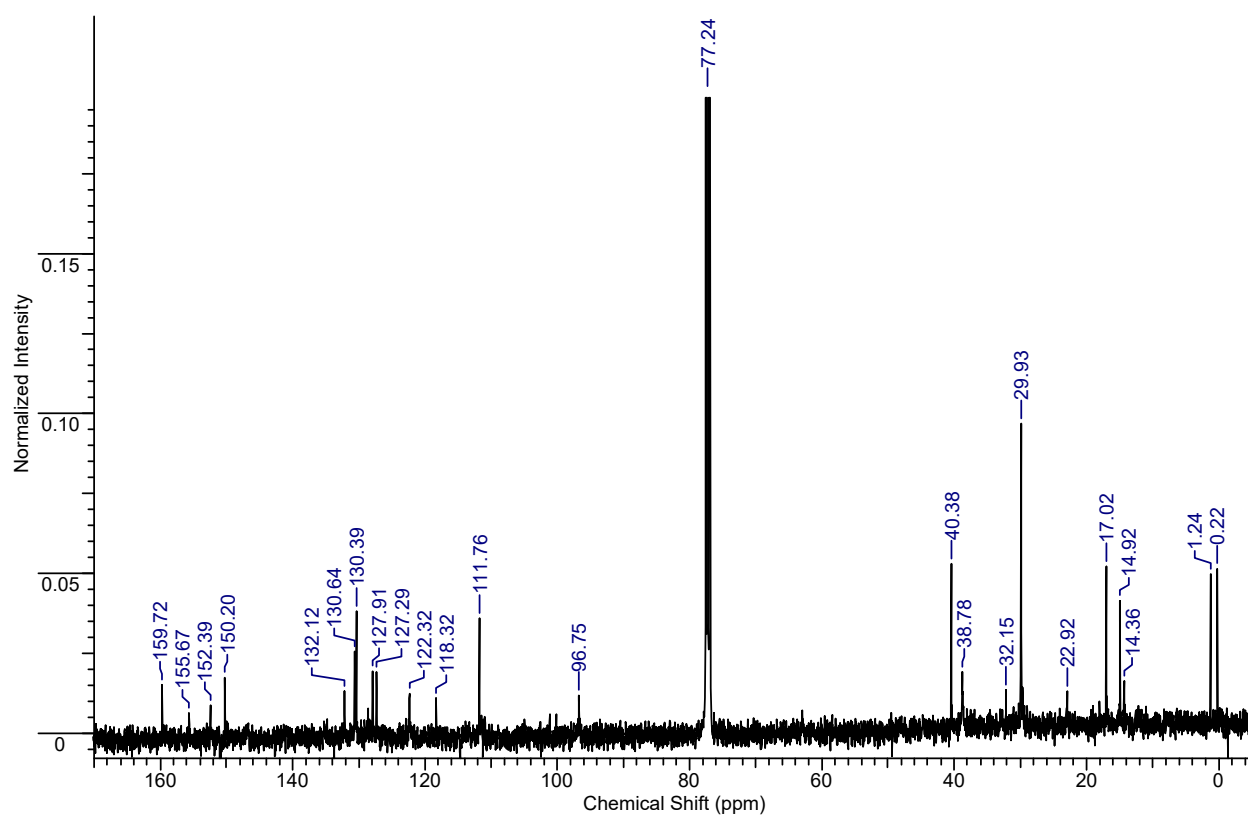

**Figure S2.**  $^{13}\text{C}$  NMR spectrum of d114 recorded in  $\text{CDCl}_3$ .

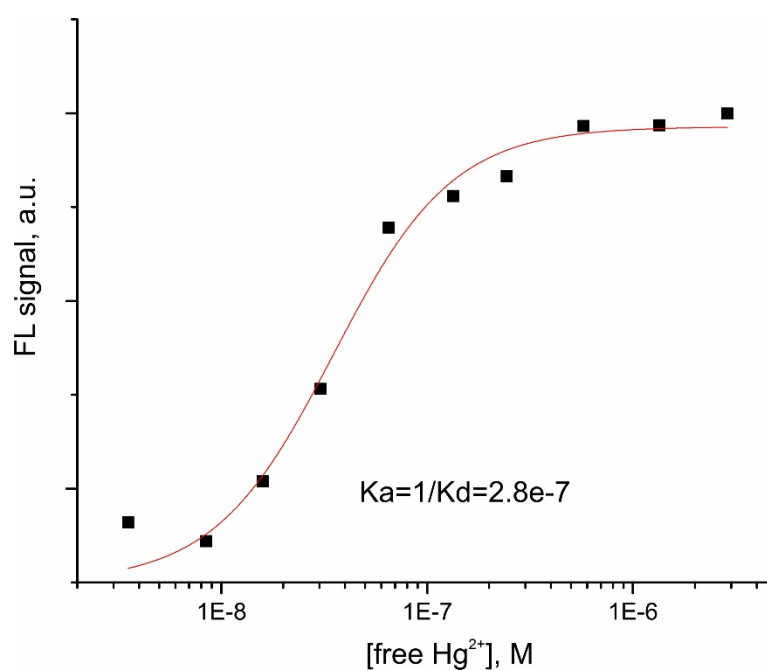

**Figure S3.** Fluorescence intensity of d114 solution versus free ligand concentration,  $[\text{free Hg}^{2+}]$  calculated according to the law of mass action.

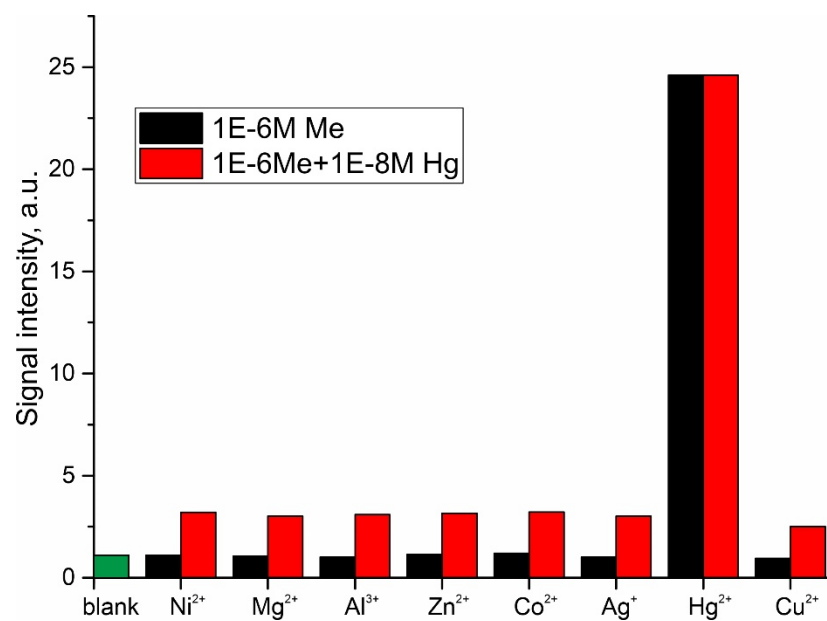

**Figure S4.** Influence of the interfering metal ions ( $10^{-6}$  M) on response value of **d114/C30/F12** 0.001/1/2 NPs in the presence of  $10^{-8}$  M  $\text{Hg}^{2+}$
